# Supplementary material for: Prognostic Significance of Infarct Size and Location: The Case of Insular Stroke
Source: PubMed Central journal article supplement (PMC6015086; doi:10.1038/s41598-018-27883-3), 2018-06-22
Supplement: 41598_2018_27883_MOESM1_ESM.pdf [file 41598_2018_27883_MOESM1_ESM.pdf]

## Supplementary information

### PROGNOSTIC SIGNIFICANCE OF INFARCT SIZE AND LOCATION: THE CASE OF INSULAR STROKE

Carlos Laredo MSc<sup>1\*</sup>; Yashu Zhao MD<sup>1\*</sup>; Salvatore Rudilosso MD<sup>1</sup>; Arturo Renú MD, PhD<sup>1</sup>; José Carlos Pariente MSc<sup>2</sup>; Ángel Chamorro MD, PhD<sup>1,2,3</sup> Xabier Urria MD, PhD<sup>1,2</sup>

#### Affiliations:

<sup>1</sup> Functional Unit of Cerebrovascular Diseases, Hospital Clinic, Barcelona, Spain

<sup>2</sup> Institut d'Investigacions Biomèdiques August Pi i Sunyer, Barcelona, Spain

<sup>3</sup> Medicine Department, School of Medicine, Universitat de Barcelona, Barcelona, Spain

\*C.L. and Y.Z. contributed equally to this manuscript

#### Corresponding authors:

Ángel Chamorro, Functional Unit of Cerebrovascular Diseases, Hospital Clínic, 170 Villarroel, 08036 Barcelona, Spain; Phone: +34 93 227 54 14; Fax: +34 93 227 57 89; Email: [achamorro@clinic.cat](mailto:achamorro@clinic.cat).

Xabier Urria, Functional Unit of Cerebrovascular Diseases, Hospital Clínic, 170 Villarroel, 08036 Barcelona, Spain; Phone: +34 93 227 54 14; Fax: +34 93 227 57 89; Email: [xurria@clinic.cat](mailto:xurria@clinic.cat).

**eFigure 1. Neuroimaging methods.**

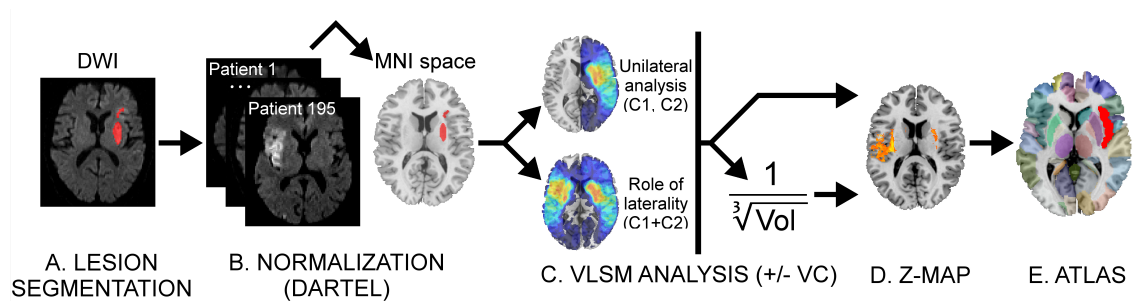

Abbreviations: DWI, diffusion-weighted image; MNI, Montreal Neurological Institute; VLSM, voxel-based lesion symptom mapping; Vol, volume.

**eFigure 2. Bilateral analysis in C1 and C2: number of voxels in each anatomical region associated with poor functional outcome before and after VC.**

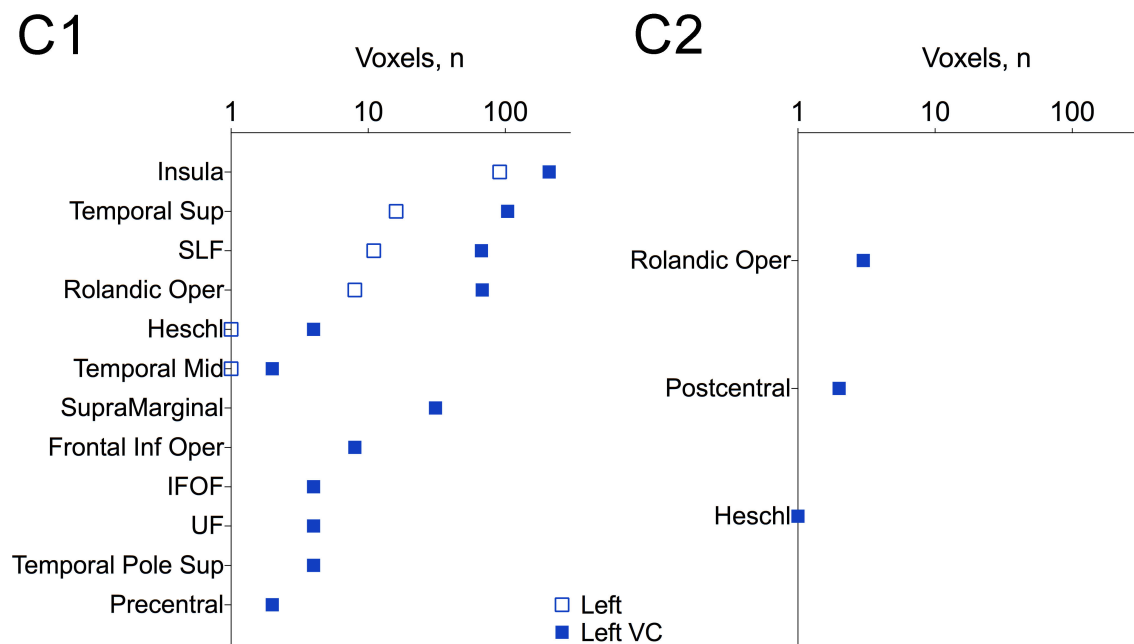

In both cohorts, poor functional outcome was only associated with lesions of left brain structures. There were no associations with death in the bilateral analysis in any of the cohorts. Abbreviations: C1, cohort 1; C2, cohort 2; SLF, superior longitudinal fasciculus; IFOF, inferior fronto-occipital fasciculus; UF, uncinata fasciculus; VC, volume control.

**eTable 1. Imaging methods in studies that investigated the clinical relevance of insular infarcts and/or laterality of the stroke.**

| <b>Main study outcome*</b> | <b>Authors</b>                   | <b>n</b> | <b>Association with insula</b>                            | <b>Imaging modality</b> | <b>Assessment of infarct size</b>                                               |
|----------------------------|----------------------------------|----------|-----------------------------------------------------------|-------------------------|---------------------------------------------------------------------------------|
| Mortality                  | Hanne L, et al. <sup>26</sup>    | 736      | Right insula                                              | MRI                     | Quantitative (converted into tertiles), not used in the final statistical model |
| Mortality                  | Alves JN, et al. <sup>41</sup>   | 561      | Insula, none after controlling for clinical severity      | CT, MRI                 | None besides baseline ASPECTS score                                             |
| Mortality                  | Sposato LA, et al. <sup>25</sup> | 2099     | Right insula                                              | CT, MRI                 | Categorical (no visible, small/medium, large/very large)                        |
| Mortality                  | Borsody M, et al. <sup>34</sup>  | 111      | Insula, none in adjusted models                           | CT, MRI                 | Semi-quantitative (A+B+C/2)                                                     |
| Mortality                  | Fink JN, et al. <sup>63</sup>    | 1644     | No effect of laterality, but infarct location not studied | Not specified           | None                                                                            |
| Mortality (cardiac death)  | Rincon F, et al. <sup>33</sup>   | 655      | None, association with left parietal lobe                 | CT, MRI                 | Categorical (<1/2 lobe, 1/2-1 lobe, >1 lobe)                                    |

|                          |                                     |      |                                                                                  |         |                                                                                                                                                              |
|--------------------------|-------------------------------------|------|----------------------------------------------------------------------------------|---------|--------------------------------------------------------------------------------------------------------------------------------------------------------------|
| Mortality                | Chamorro A, et al. <sup>32</sup>    | 136  | None                                                                             | CT, MRI | Semi-quantitative                                                                                                                                            |
| Mortality                | Abboud H, et al. <sup>28</sup>      | 510  | Right insula                                                                     | MRI     | Semi-quantitative (A+B+C/2), not included in the model despite significant differences in the volume of non-insular, left-insular and right-insular infarcts |
| Mortality                | Christensen H, et al. <sup>27</sup> | 179  | Right insula                                                                     | CT      | Quantitative                                                                                                                                                 |
| Mortality                | Colivicchi F, et al. <sup>15</sup>  | 208  | Right insula                                                                     | CT, MRI | Semi-quantitative (A+B+C/2), not used in the model                                                                                                           |
| Mortality (sudden death) | Algra A, et al. <sup>55</sup>       | 2885 | None, associated with left-sided infarcts                                        | CT, MRI | Categorical ( $\geq 2$ cm)                                                                                                                                   |
| Mortality                | Tokgözoglu SL, et al. <sup>10</sup> | 62   | Right insula                                                                     | CT, MRI | Not specified                                                                                                                                                |
| Cardiac (arrhythmias)    | Seifert F, et al. <sup>18</sup>     | 93   | Right hemispheric infarcts, including the insula, none in volume-adjusted models | CT, MRI | Quantitative, cleared the associations when included in the imaging analysis                                                                                 |

|                                              |                                     |      |                                 |               |                                                    |
|----------------------------------------------|-------------------------------------|------|---------------------------------|---------------|----------------------------------------------------|
| Cardiac (adverse cardiac outcome)            | Laowattana S, et al. <sup>13</sup>  | 116  | Left insula                     | CT, MRI       | None                                               |
| Cardiac (acute cardiovascular events)        | Fink JN, et al. <sup>38</sup>       | 150  | None                            | MRI           | Categorical                                        |
| Cardiac (new atrial fibrillation)            | Scheitz JF, et al. <sup>17</sup>    | 1823 | Insula, no effect of laterality | Not specified | None                                               |
| Cardiac (Troponin T elevation)               | Ay H, et al. <sup>14</sup>          | 738  | Right insula                    | MRI           | Quantitative, but not used in the imaging analysis |
| Cardiac (recent and new atrial fibrillation) | Vingerhoets F, et al. <sup>16</sup> | 1661 | Parietoinsular cortex           | CT            | None                                               |
| Poor functional outcome                      | Munsch F, et al. <sup>61</sup>      | 289  | None in adjusted models         | MRI           | Quantitative, included in the statistical analysis |

|                                         |                                  |     |                                                                              |         |                                                          |
|-----------------------------------------|----------------------------------|-----|------------------------------------------------------------------------------|---------|----------------------------------------------------------|
| Poor functional outcome                 | Timpone VM, et al. <sup>24</sup> | 55  | Percentage of insular infarct in the subgroup of patients with small strokes | CT, MRI | Quantitative, but dichotomized in the statistical models |
| Poor functional outcome                 | Wu O, et al. <sup>52</sup>       | 490 | Left hemispheric lesions (minor contribution of the left insula)             | MRI     | Quantitative, included in the imaging analysis           |
| Poor functional outcome                 | Yassi N, et al. <sup>31</sup>    | 152 | None, associations in other regions in the brain                             | MRI     | Quantitative                                             |
| Poor functional outcome                 | Cheng B, et al. <sup>60</sup>    | 101 | Insula, no effect of laterality                                              | MRI     | Quantitative, not included in the imaging analysis       |
| Stroke-associated infection             | Urra X, et al. <sup>44</sup>     | 106 | Insula, no significant effect of laterality                                  | MRI     | Quantitative, included in the imaging analysis           |
| Stroke-associated infection (pneumonia) | Kemmling A, et al. <sup>20</sup> | 430 | Right insula                                                                 | MRI     | Quantitative, not included in the imaging analysis       |

|                                         |                                    |     |                                                            |         |                                                                                                           |
|-----------------------------------------|------------------------------------|-----|------------------------------------------------------------|---------|-----------------------------------------------------------------------------------------------------------|
| Stroke-associated infection             | Walter U, et al. <sup>19</sup>     | 384 | Insula, no effect of laterality                            | CT, MRI | Categorical (<1.5cm, 1.5cm-33% MCA, 33-66% MCA, >66% MCA), not included in the final statistical analysis |
| Stroke-associated infection             | Wartenbert K, et al. <sup>68</sup> | 94  | Insula, none in adjusted models.                           | MRI     | Quantitative                                                                                              |
| Stroke-associated infection             | Harms H, et al. <sup>69</sup>      | 63  | No association with insula nor laterality                  | CT      | Quantitative                                                                                              |
| Stroke-associated infection             | Minnerup J, et al. <sup>29</sup>   | 591 | No specific location, no effect of laterality              | CT, MRI | Categorical (<1.5cm, intermediate, >5cm or 1/3 of MCA)                                                    |
| Stroke-associated infection (pneumonia) | Steinhagen V, et al. <sup>21</sup> | 60  | Insula, no effect of laterality                            | CT, MRI | Categorical (<33% MCA, 33-66% MCA, >66% MCA)                                                              |
| Aspiration                              | Galovic M, et al. <sup>22</sup>    | 94  | Insula and frontal operculum, no differences in laterality | MRI     | Quantitative                                                                                              |

|                                          |                                    |     |                                                                      |         |                                                                         |
|------------------------------------------|------------------------------------|-----|----------------------------------------------------------------------|---------|-------------------------------------------------------------------------|
| Autonomic<br>(sympathetic<br>activation) | Meyer S, et al. <sup>12</sup>      | 29  | Right insula                                                         | MRI     | None                                                                    |
| Autonomic (heart<br>rate variability)    | Barron SA, et al. <sup>11</sup>    | 40  | Right hemisphere linked to<br>reduced parasympathetic<br>innervation | CT      | None                                                                    |
| Hyperglycemia                            | Winder K, et al. <sup>23</sup>     | 229 | Right insula                                                         | MRI     | Quantitative, introduced together with<br>NIHSS in the imaging analysis |
| Smoking cessation                        | Suñer-Soler R, et al. <sup>6</sup> | 110 | Insula, no effect of laterality                                      | CT, MRI | Semi-quantitative (A+B+C/2)                                             |

\* In studies assessing several outcomes we show the clinically most important one. Abbreviations: MCA, middle cerebral artery; ASPECTS, Alberta Stroke Program Early CT Score.



**eTable 2. Statistically significant prevalences of the clinical end-points in patients with insular strokes in each cohort with an alpha of 0.05 and a power of 0.8.**

|        |     |                              | Death                            |                                                |                                                |                                     | Poor outcome                     |                                                |                                                |                                     |
|--------|-----|------------------------------|----------------------------------|------------------------------------------------|------------------------------------------------|-------------------------------------|----------------------------------|------------------------------------------------|------------------------------------------------|-------------------------------------|
| Cohort | n   | Prevalence of insular stroke | Prevalence in non-insular stroke | Significant lower prevalence in insular stroke | Significant upper prevalence in insular stroke | Actual prevalence in insular stroke | Prevalence in non-insular stroke | Significant lower prevalence in insular stroke | Significant upper prevalence in insular stroke | Actual prevalence in insular stroke |
| C1     | 90  | 0.633                        | 0.03                             | Not powered                                    | 0.24                                           | 0.175                               | 0.152                            | Not powered                                    | 0.44                                           | 0.526*                              |
| C2     | 105 | 0.705                        | 0.032                            | Not powered                                    | 0.23                                           | 0.149                               | 0.419                            | 0.12                                           | 0.74                                           | 0.554                               |
| C1+ C2 | 195 | 0.672                        | 0.031                            | Not powered                                    | 0.15                                           | 0.16*                               | 0.281                            | 0.093                                          | 0.50                                           | 0.542*                              |

\* Prevalences above the statistically significant limits compared to patients with non-insular stroke.

**eTable 3. Effect of total lesion volume: percentage of voxels associated to each region in the brain that disappear after VC.**

| Structure         | Poor Outcome (%) | Death (%) |
|-------------------|------------------|-----------|
| Temporal Mid      | 81               | 100       |
| Insula            | 73               | 99        |
| Temporal Sup      | 72               | 100       |
| SupraMarginal     | 68               | 99        |
| Rolandic Oper     | 47               | 100       |
| SLF               | 46               | 100       |
| Postcentral       | 24               | 99        |
| CT                | 100              |           |
| Frontal Inf Oper  |                  | 100       |
| Temporal Pole Mid |                  | 99        |
| Caudate           | 95               |           |
| Putamen           | 95               |           |
| Frontal Inf Tri   |                  | 94        |
| UF                | 93               |           |
| Temporal Pole Sup |                  | 88        |
| Heschl            | 77               |           |
| IFOF              | 76               |           |
| Precentral        | 40               |           |

We quantified the reduction in the association in structures that showed associations before VC in both cohorts. Abbreviations: SLF, superior longitudinal fasciculus; CT, corticospinal tract; UF, uncinate fasciculus; IFOF, inferior fronto-occipital fasciculus; VC, volume control.

**eTable 4. General characteristics of the biased population after excluding patients with left lesions in the upper tertile of NIHSS scores.**

|                        | Right (n=94) | Left (n=68) | P     |
|------------------------|--------------|-------------|-------|
| Age (years), mean (SD) | 71 (12)      | 72 (12)     | 0.649 |
| Sex (male), %          | 57           | 62          | 0.543 |

|                                     |            |           |       |
|-------------------------------------|------------|-----------|-------|
| Admission NIHSS score, median (IQR) | 12 (10-17) | 10 (6-17) | 0.174 |
| Glucose at admission,               | 125 (36)   | 141 (64)  | 0.044 |
| Large vessel occlusion, %           | 81         | 76        | 0.237 |
| 24h NIHSS score, median (IQR)       | 6 (2-12)   | 4 (2-12)  | 0.225 |
| Infarct volume (cc), median (IQR)   | 18 (6-45)  | 11 (1-31) | 0.023 |
| Insular stroke, %                   | 72         | 53        | 0.013 |
| 3-month mRS score, median (IQR)     | 2 (1-4)    | 1 (0-3)   | 0.024 |
| Death at 3 months, %                | 10         | 7         | 0.605 |

---

Abbreviations: NIHSS, National Institutes of Health Stroke Scale; mRS, modified Rankin Scale.

### Supplementary References

68. Wartenberg KE, Stoll A, Funk A, Meyer A, Schmidt JM, Berrouschot J. Infection after acute ischemic stroke: risk factors, biomarkers, and outcome. *Stroke Res Treat.* 2011;2011(1):830614. doi:10.4061/2011/830614.
69. Harms H, Reimnitz P, Bohner G, et al. Influence of stroke localization on autonomic activation, immunodepression, and post-stroke infection. *Cerebrovasc Dis.* 2011;32(6):552-560. doi:10.1159/000331922.
